# Supplementary material
Source: publisher figshare collection journal article supplement (https://acs.figshare.com/ndownloader/files/4485901)
Supplement: Supplementary file 1 [file 4485901]

# **Multi–Scale Modeling of Proteins**

## **Supporting Information**

Valentina Tozzini\*

*NEST, CNR-INFM and Scuola Normale Superiore, Piazza dei Cavalieri 7, I-56126 Pisa, Italy*

E-mail: [tozzini@nest.sns.it](mailto:tozzini@nest.sns.it)

---

<sup>†</sup>NEST, CNR-INFM and Scuola Normale Superiore, Piazza dei Cavalieri 7, I-56126 Pisa, Italy

Table 1: Selected theoretical calculations of the excitation energies of the GFP chromophore. The calculation in a solvated environment are performed either with microsolvation or with continuous polarizable models.

|                                                                                                                                                                                                                                                                                                                                                                                                                                                                                                                | neutral        | in water       | anion     | in water |
|----------------------------------------------------------------------------------------------------------------------------------------------------------------------------------------------------------------------------------------------------------------------------------------------------------------------------------------------------------------------------------------------------------------------------------------------------------------------------------------------------------------|----------------|----------------|-----------|----------|
| semiempirical                                                                                                                                                                                                                                                                                                                                                                                                                                                                                                  |                |                |           |          |
| INDO-CI <i>a,b</i>                                                                                                                                                                                                                                                                                                                                                                                                                                                                                             | 3.81           |                | 2.77      | 2.85     |
| NDDO-G-CI <i>c</i>                                                                                                                                                                                                                                                                                                                                                                                                                                                                                             | 3.47           |                | 2.70      |          |
| NDDO-OM2/PERTCI <i>d</i>                                                                                                                                                                                                                                                                                                                                                                                                                                                                                       | 3.44           |                | 2.48      |          |
| MNDOC-CASCI <i>e</i>                                                                                                                                                                                                                                                                                                                                                                                                                                                                                           | 3.52           |                | 2.70      |          |
| AM1-CASCI <i>f</i>                                                                                                                                                                                                                                                                                                                                                                                                                                                                                             | 3.56           |                |           |          |
| AM1-CISD <i>f</i>                                                                                                                                                                                                                                                                                                                                                                                                                                                                                              | 3.83           |                |           |          |
| PM3-CASCI <i>f</i>                                                                                                                                                                                                                                                                                                                                                                                                                                                                                             | 3.51           |                |           |          |
| MNDO-CASCI <i>f</i>                                                                                                                                                                                                                                                                                                                                                                                                                                                                                            | 3.84           |                |           |          |
| AM1-FOMO-CI <i>g</i>                                                                                                                                                                                                                                                                                                                                                                                                                                                                                           | 3.58           | 3.52           |           |          |
| ab initio                                                                                                                                                                                                                                                                                                                                                                                                                                                                                                      |                |                |           |          |
| HF <i>h</i>                                                                                                                                                                                                                                                                                                                                                                                                                                                                                                    | 5.53           |                | 4.71      |          |
| UHF <i>h</i>                                                                                                                                                                                                                                                                                                                                                                                                                                                                                                   | 3.51           |                | 2.29      |          |
| CIFS <i>h</i>                                                                                                                                                                                                                                                                                                                                                                                                                                                                                                  | 5.23           |                | 4.37      |          |
| MSCF <i>h</i>                                                                                                                                                                                                                                                                                                                                                                                                                                                                                                  | 4.52           |                | 3.54      |          |
| SAC/SAC-CI <i>i</i>                                                                                                                                                                                                                                                                                                                                                                                                                                                                                            | 3.33           |                | 2.22      |          |
| CASSCF <i>j</i>                                                                                                                                                                                                                                                                                                                                                                                                                                                                                                | 5.25           |                |           |          |
| CASPT2 <i>j,k,l,m,n</i>                                                                                                                                                                                                                                                                                                                                                                                                                                                                                        | 3.85 3.69 3.56 |                | 2.67 2.66 | 2.85     |
| TDDFT                                                                                                                                                                                                                                                                                                                                                                                                                                                                                                          |                |                |           |          |
| BLYP-TD <i>n</i>                                                                                                                                                                                                                                                                                                                                                                                                                                                                                               | 3.33           |                | 3.24      |          |
| B3LYP <i>n,j,o</i>                                                                                                                                                                                                                                                                                                                                                                                                                                                                                             | 3.54 3.46      | 3.30           | 3.08 3.07 | 2.97     |
| B3LYP+corr <i>n</i>                                                                                                                                                                                                                                                                                                                                                                                                                                                                                            | 3.52           |                | 2.65      |          |
| BPE-TD <i>p</i>                                                                                                                                                                                                                                                                                                                                                                                                                                                                                                | 3.57           | 3.38           | 3.12      | 3.02     |
| Expt <i>q,r,s</i>                                                                                                                                                                                                                                                                                                                                                                                                                                                                                              |                | 3.33 3.31 3.29 | 2.59      | 2.92     |
| Acronyms: INDO, NDDO, AM1, PM3 = different kinds of semi-empirical Hamiltonians; (U)HF = (Unrestricted) Hartree Fock; CAS=Complete Active Space; SCF = Self Consistent Field; MC = Multiple Configuration CI(F)S=Configuration Interaction (Full) Singles; SD = Single Determinant; FOMO = Floating Occupation Molecular Orbitals; SAC = Symmetry Adapted Cluster; PT= Perturbation Treatment; TD=Tamm- Dankoff approximation; B(3)LYP, PBE = different kinds of exchange and correlation density functionals. |                |                |           |          |

a. Voityuk, A A et al.. *Chem. Phys. Lett.* **1997**, 272, 162  
b. Voityuk, A.A. et al. *Chem Phys* **2001**, 269, 83  
c. Voityuk, A. A et al *Chem Phys* **1998**, 231, 13  
d. Weber, W et al. *Proc Natl Acad Sci USA* **1999**, 96, 6177  
e. Laino, T et al. *Chem Phys* **2004**, 298, 17  
f. Toniolo, A et al.. *J Phys Chem A* **2002**, 106, 4679  
g. Toniolo, A et al. J. *J Phys Chem A* **2003**, 107, 3822  
h. Helms, et al. *J Mol Struct (Theochem)* **2000**, 506, 179  
i. Das, A.K et al. *J Comput Chem* **2003**, 24,1421  
j. Vendrell, O et al. *Chem Phys Lett* **2004**, 396, 202

k. Toniolo, A et al. *Faraday Discuss* **2004**, 127, 149  
l. Martin, M et al. *J Am Chem Soc* **2004**, 126, 5452  
m. Sinicropi, A et al. *J Am Chem Soc* **2004**, 127, 11534  
n. Nifosi, R et a. *J. Comput. Chem.* **2007**, 28, 2366  
o. Xie, D.; Zeng, J. *J Comput Chem* **2005**, 26, 1487  
p. Timerghazin, Q.K et al. *J Phys Chem B* **2008**, 112, 2533  
q. Voliani, V et al., *J Phys Chem B* **2008**, 112, 10714  
r. Lammich, L et al. *Biophys J* **2007**, 92, 201  
s. Dong, J. et al. *J Am Chem Soc* **2006**, 128, 12038

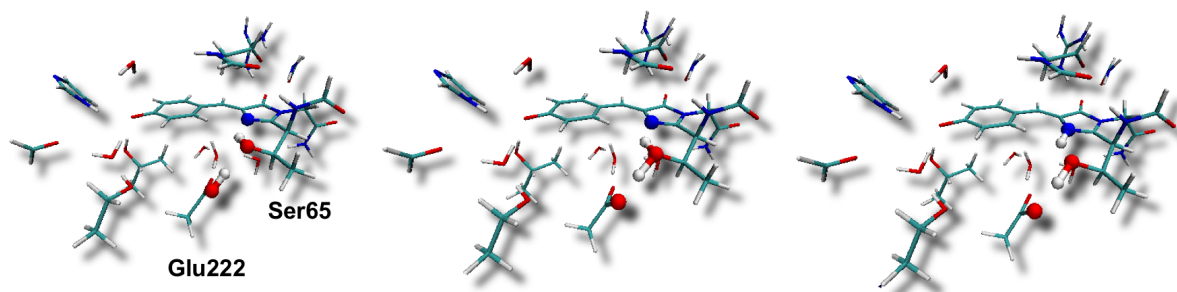

Figure 1: The formation of the zwitterionic state from the anionic by proton transfer from Glu222 via Ser65 in EGFP. Snapshots from a CP MD simulation on the excited state with the restricted open shell method.<sup>1</sup>

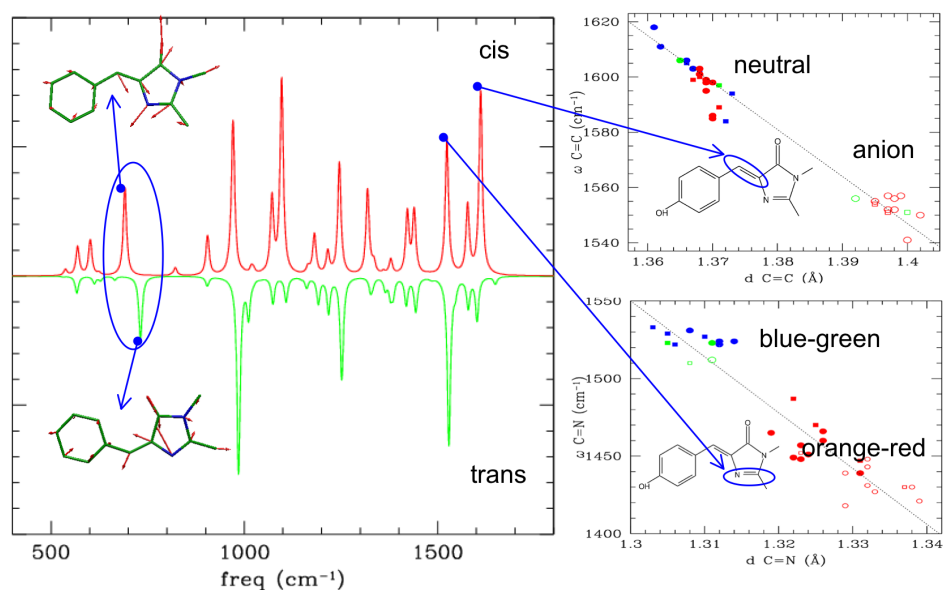

Figure 2: On-resonance Raman spectra of the cis (red) and trans (green) BFPF (obligate neutral) chromophore. The low frequency fingerprint band discriminating the two isomers is highlighted, as the two fingerprint modes corresponding to the C=C and C=N bonds vibrations. Their frequencies as a function of the bond length reported in the plots for all the chromophore types. The C=C band can discriminate the neutral from the anionic structures, the C=N band, the blue-green from the red-range ones (full symbols: neutral chromophores, empty, anionic chromophores; the color of the symbols roughly corresponds to the emitting color).<sup>2</sup>

## References

- 1 Nifosí, R.; Tozzini, V.; Beltram, F. *Universality and Diversity in Science, Festschrift in honor of N K Rahman 60th birthday*; CRC press, 2004; p 127.
- 2 Nifosí, R.; Amat, P.; Tozzini, V. *J. Comput. Chem.* **2007**, 28, 2366–2377.
